# Supplementary material for: Modulation of experimental conditions towards generation of a heterometallic Na2Co4 cluster or a homometallic Co4 cluster and ligand formed in situ
Source: Royal Society of Chemistry journal article supplement (doi:10.1039/c3ce42466a), 2014-01-01
Supplement: c3ce42466a.pdf [file c3ce42466a.pdf]

# Modulation of experimental conditions towards generation of heterometallic $\text{Na}_2\text{Co}_4$ or homometallic $\text{Co}_4$ cluster and ligand formed in situ

Xiao-min Zhang, Jian-qiang Li, Shu-juan Liu, Ming-biao Luo, Wen-yuan Xu, and Feng Luo

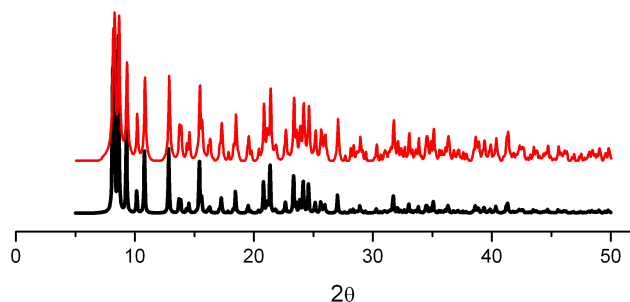

**Figure S1.** For **1**, the plots of PXRD patterns for the data simulated from the single crystal data (black) and the experimental data (red).

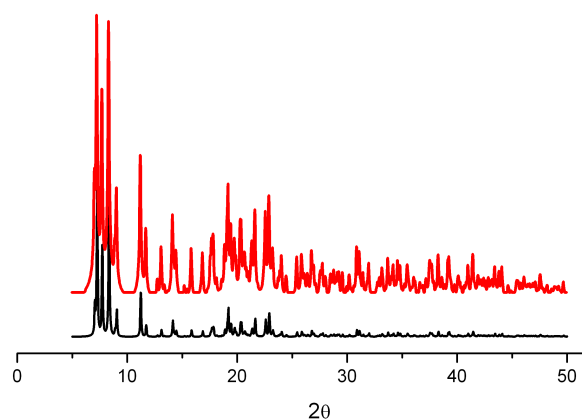

**Figure S1.** For **2**, the plots of PXRD patterns for the data simulated from the single crystal data (black) and the experimental data (red).
